# Supplementary material for: Estimate of Growth Parameters of Penaeus kerathurus (Forskäl, 1775) (Crustacea, Penaeidae) in the Northern Adriatic Sea
Source: MDPI journal article supplement (doi:10.3390/ani14071068), 2024-03-31
Supplement: s1 [file s1]

## Supplementary Material

### Estimate of growth parameters of *Penaeus kerathurus* (Forskäl, 1775) (Crustacea, Penaeidae) in the North Adriatic Sea

Martina Scanu, Carlo Frogia, Fabio Grati and Luca Bolognini

For the production of the following Figures, growth parameter values for  $L_{inf}$ ,  $K$  and  $t_a$  were averaged between the 2 algorithms and the 2 VBGF configurations used, as presented in Table 3 of the Manuscript. On the other hand, the specific seasonal values ( $t_s$  and  $C$ ) were simply averaged between the 2 algorithms (ELEFAN\_GA\_boot and ELEFAN\_SA\_boot).

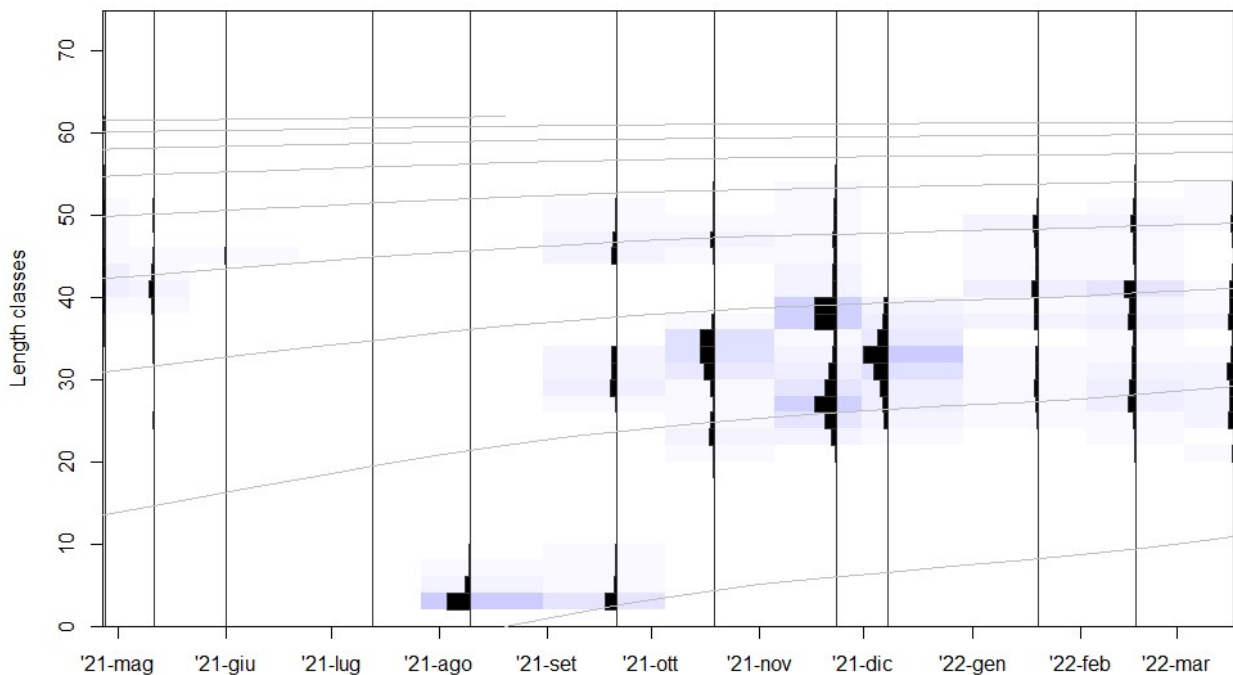

Figure S1: Monthly LFDs of Female individuals together with the fitting of the averaged seasonal parameters.

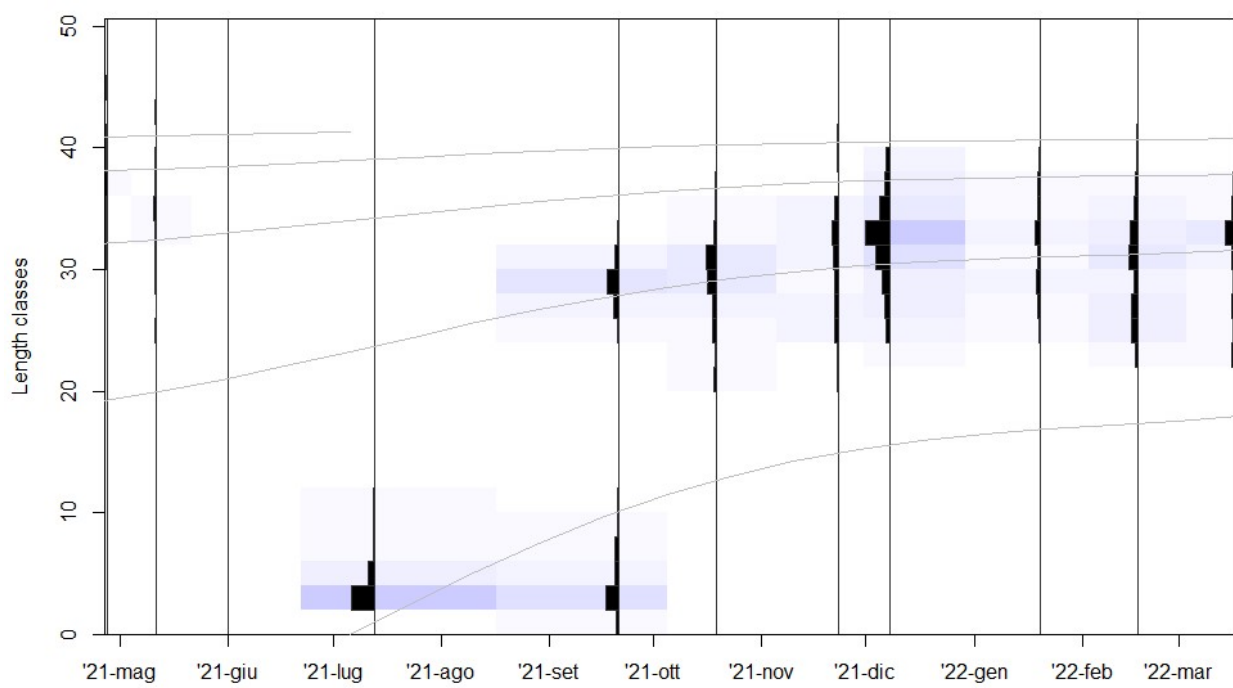

Figure S2: Monthly LFDs of Male individuals together with the fitting of the averaged seasonal parameters.
